# Supplementary material
Source: MDPI journal article supplement (https://www.mdpi.com/1996-1073/16/20/7084)
Supplement: s1 [file s1]

# Limitations Imposed Using an Iodide/Triiodide Redox Couple in Solar-Powered Electrochromic Devices

George Syrokostas \*, Sarantis Tsamoglou and George Leftheriotis

Renewable Energy Laboratory, Department of Physics, University of Patras, GR-26504 Patra, Greece;

tsamogloys@gmail.com (S.T.) glefther@upatras.gr (G.L.)

\* Correspondence: gesirrokos@upatras.gr

**Table S1.** Comparative table with hybrid ECDs having different redox electrolytes.

| Redox Couple                    | Optical Modulation ( $\Delta T$ ) | Bias Potential    | Switching Time (s) | Nr of Cycles/Operation Time | Ref.     |
|---------------------------------|-----------------------------------|-------------------|--------------------|-----------------------------|----------|
| $I^- / I_3^-$                   | 61.8% (visual)                    | - 2 V / +0.5 V    | 8*                 |                             | [1]      |
| Thiolate/disulphide ( $T/T_2$ ) | 52 % at 550 nm                    | - 2.5 V / + 1.0 V | 28 / 15**          | 50 cycles                   | [2]      |
| $I^- / I_3^-$                   | 45 % at 550 nm                    |                   | 5 / 23**           |                             |          |
| $Fc^+ / Fc$                     | 52 %                              | - 1.5 V / 0 V     | 10 / 22**          | 10 h                        | [3]      |
| TMTU/TMFDS <sup>2+</sup>        | 67.8 % at 648 nm                  | - 1.2 V / 1.0 V   | 7.3 / 5.9          | > 100,000 cycles            | [4]      |
| $I^- / I_3^-$                   | 44.3 % (vis)                      | - 1 V             | -                  |                             | [5]      |
| TMTU/TMFDS <sup>2+</sup>        | 68 % (vis)                        | - 1 V             | -                  |                             | [5]      |
| TMTU/TMFDS <sup>2+</sup>        | 55 % (vis)                        | - 1.5 V / 1.5 V   | < 5 min            |                             | [6]      |
| $I^- / I_3^-$                   | 42.9 % (vis)                      | -0.72 V / 0.6 V   | 5 min              |                             | [7]      |
| TMTU/TMFDS <sup>2+</sup>        | 57.2 % (vis)                      | -0.795 V / 0.6 V  |                    |                             |          |
| TEMPO/TEMPO <sup>+</sup>        | 31.4 % (vis)                      | -1.035 V / 0.6 V  |                    |                             | [7]      |
| TMTU/TMFDS <sup>2+</sup>        | 32 % (vis)                        | -2 V / 2 V        |                    |                             | [8]      |
| TTF                             | 93 %                              | -0.9 V / no bias  | 12 / 28 **         | 200 cycles                  | [9]      |
| $I^- / I_3^-$                   | 30 – 35 % at 634 nm               | - 1.5 V / 1.7 V   | 60 / 60            | 11,000 cycles               | [10]     |
| TMTU/TMFDS <sup>2+</sup>        | 68.2 % at 603 nm                  | -1.5 V / 1.2 V    | 12.8 / 5.3**       | 10,000 cycles               | [11]     |
| $I^- / I_3^-$                   | 59.4 %                            | - 1.8 V / 1.2 V   | 3.1 / 1.9**        |                             | [12]     |
| $I^- / I_3^-$                   |                                   |                   |                    |                             | Our work |

\*: the time to achieve a reduction of the transmittance by a factor of 10; \*\*:  $\tau_c$  and  $\tau_b$  represents the time to modulate the 90% of the maximum  $\Delta T$ .

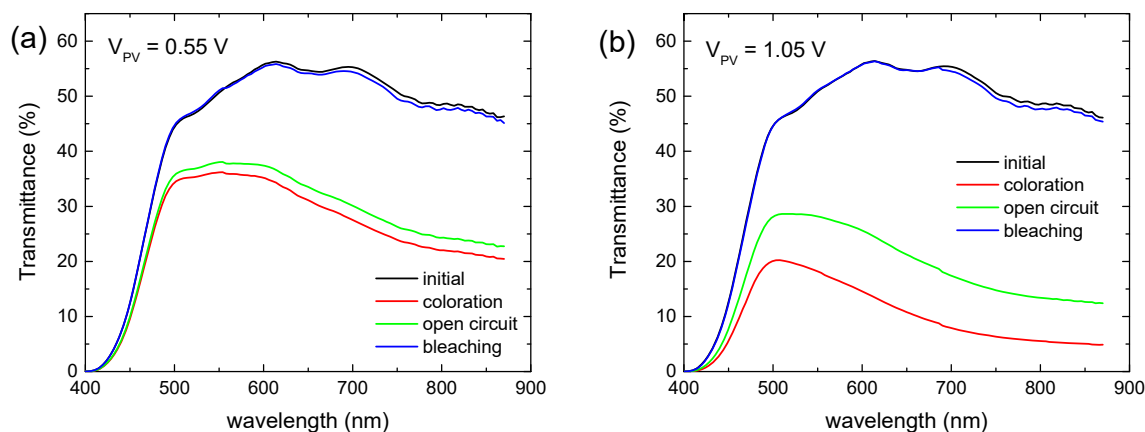

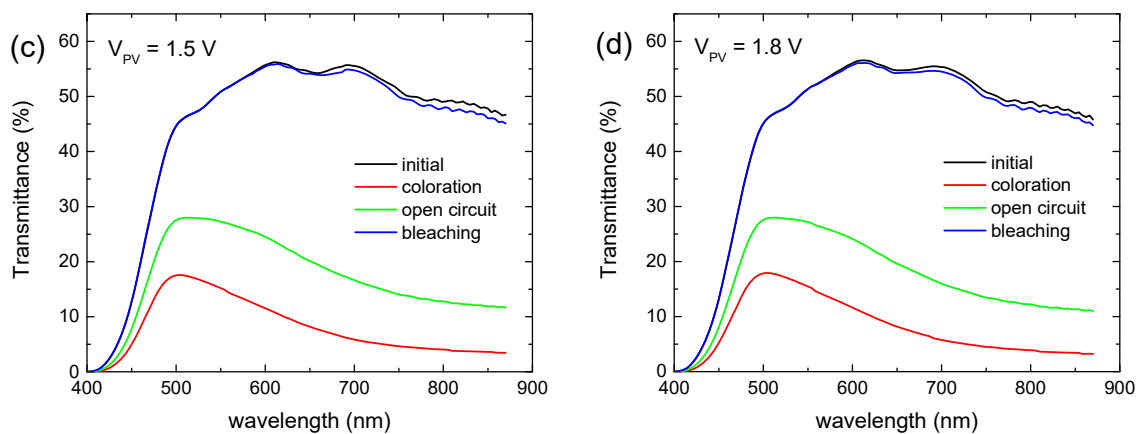

**Figure S1.** Transmittance spectra of a hybrid ECD during a coloration – bleaching cycle for the different values of the applied bias potential ( $V_{PV}$ ), which was increased using series connected mini silicon solar cells: (a) 1 mini silicon solar cell, (b) 2 mini silicon solar cells, (c) 3 mini silicon solar cells and (d) 4 mini silicon solar cells.

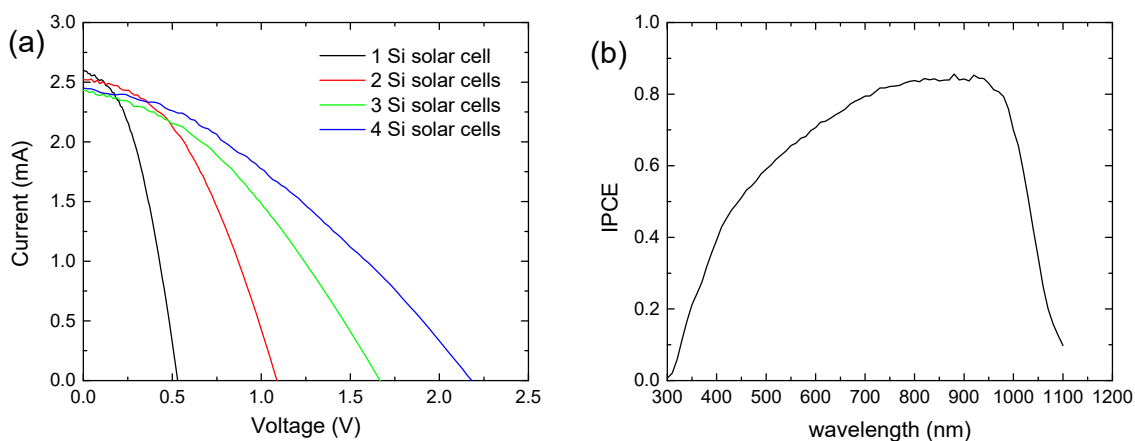

**Figure S2.** (a) Typical I-V curves of up to 4 series connected BPW34 mini-Si solar cells and (b) a typical IPCE spectrum.

**Table S2.** Characteristic photovoltaic properties of series connected BPW34 mini silicon solar cells.

|                  | Voc (V) | Isc (mA) | FF    | PCE (%) |
|------------------|---------|----------|-------|---------|
| 1 Si solar cell  | 0.532   | 2.60     | 0.421 | 12.9    |
| 2 Si solar cells | 1.09    | 2.52     | 0.421 | 13.0    |
| 3 Si solar cells | 1.68    | 2.43     | 0.366 | 12.1    |
| 4 Si solar cells | 2.19    | 2.45     | 0.345 | 11.1    |

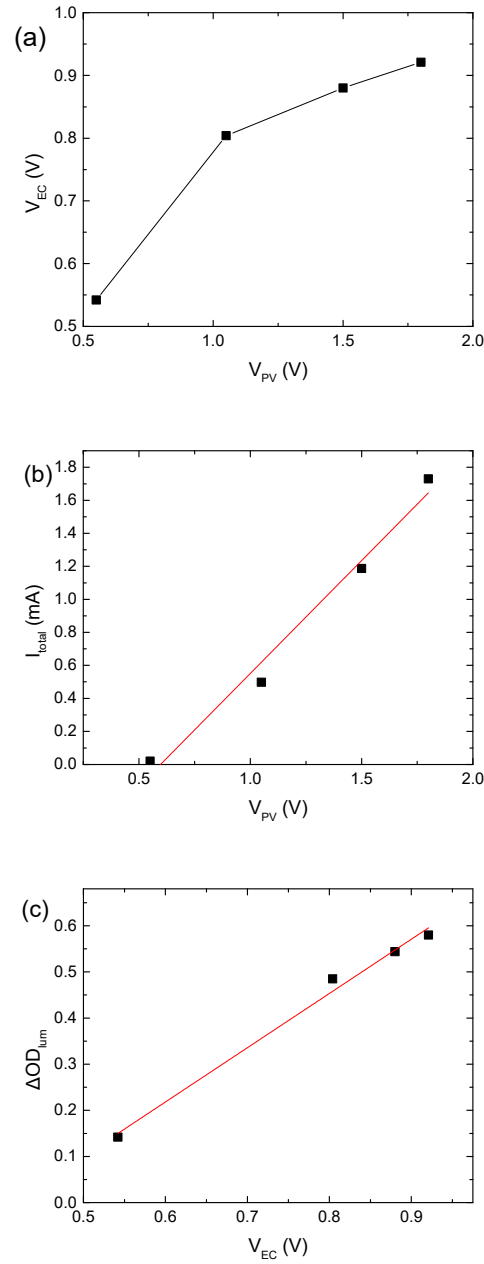

**Figure S3.** (a) Variation in the voltage at the ECD terminals ( $V_{EC}$ ) with respect to the applied bias potential ( $V_{PV}$ ), (b) linear increment in  $I_{total}$  passing through of the ECD with the applied bias potential ( $V_{PV}$ ), (c) linear increment in the luminous optical density modulation with the voltage at the ECD terminals ( $V_{EC}$ ).

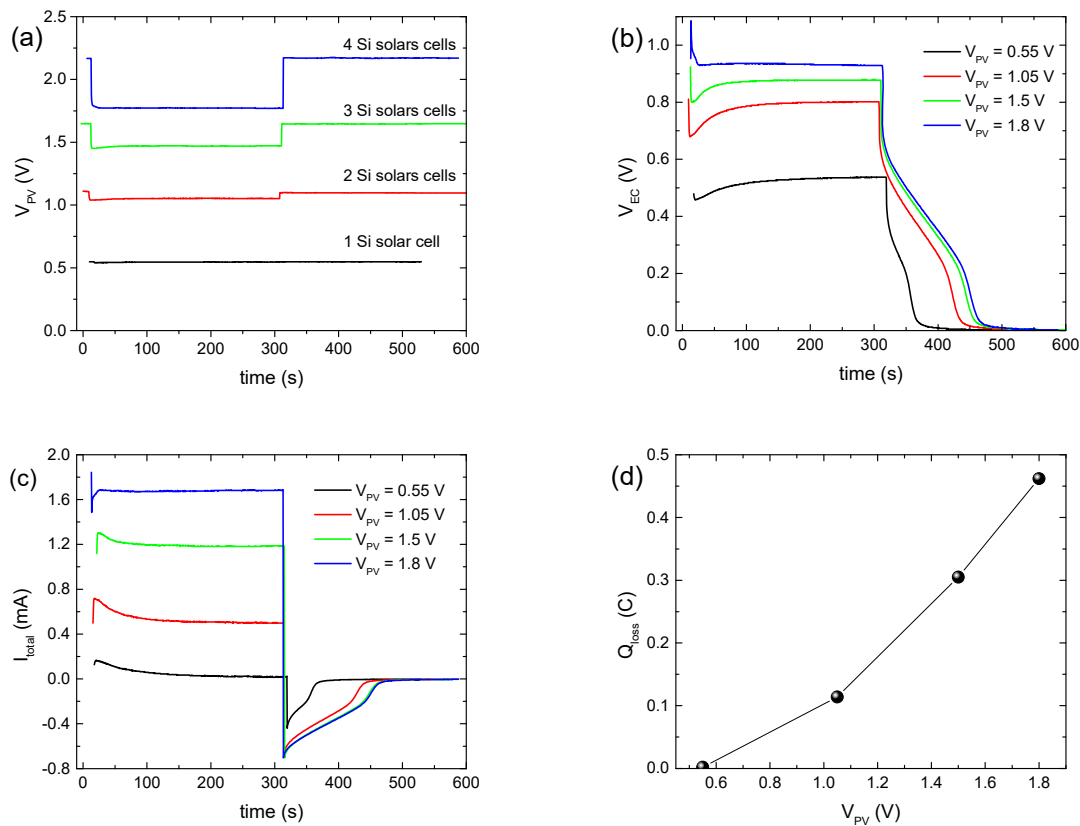

**Figure S4.** Variation in the applied bias potential  $V_{PV}$  (a), the potential at the terminals of the ECD ( $V_{EC}$ ) (b) and the total current density ( $I_{total}$ ) passing through the ECD (c) during a coloration-bleaching cycle, (d) variation in  $Q_{loss}$  with the applied bias potential ( $V_{PV}$ ).

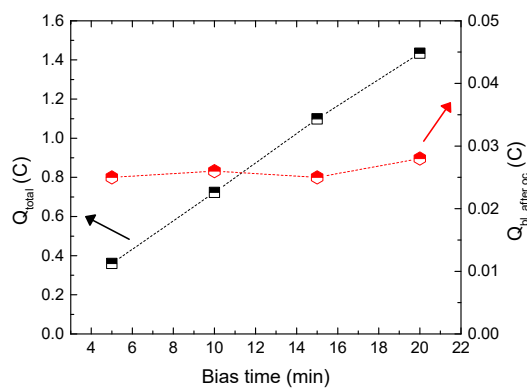

**Figure S5.** Variation in the total charge ( $Q_{total}$ ) and the charge released from the  $WO_3$  layer during bleaching ( $Q_{bl, after oc}$ ) with the bias time, after an open circuit step.

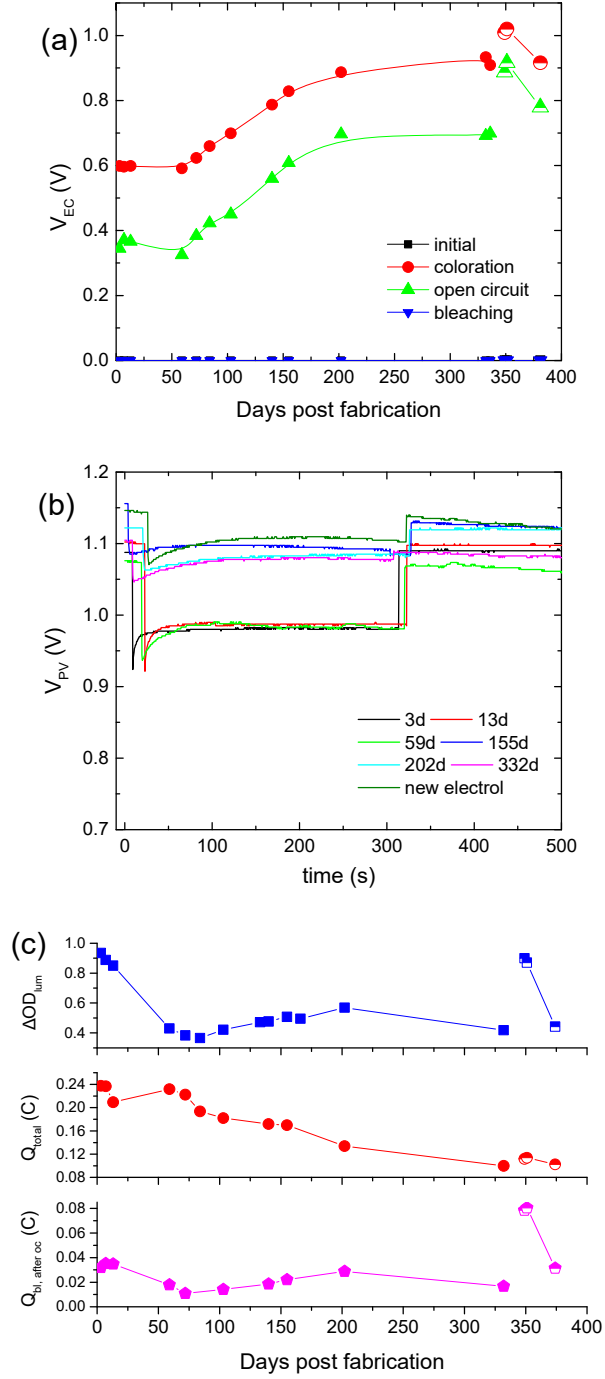

**Figure S6.** (a) Variation in the potential at the terminals of the ECD ( $V_{EC}$ ) at the end of each step during a coloration-bleaching cycle with days post-fabrication, (b) variation in the applied bias potential ( $V_{PV}$ ) for specific days post-fabrication during coloration of the ECD, (c) variation in  $\Delta OD_{lum}$ ,  $Q_{total}$  and  $Q_{bl, after oc}$  with days post-fabrication. (open symbols are used in the case of the fresh electrolyte).

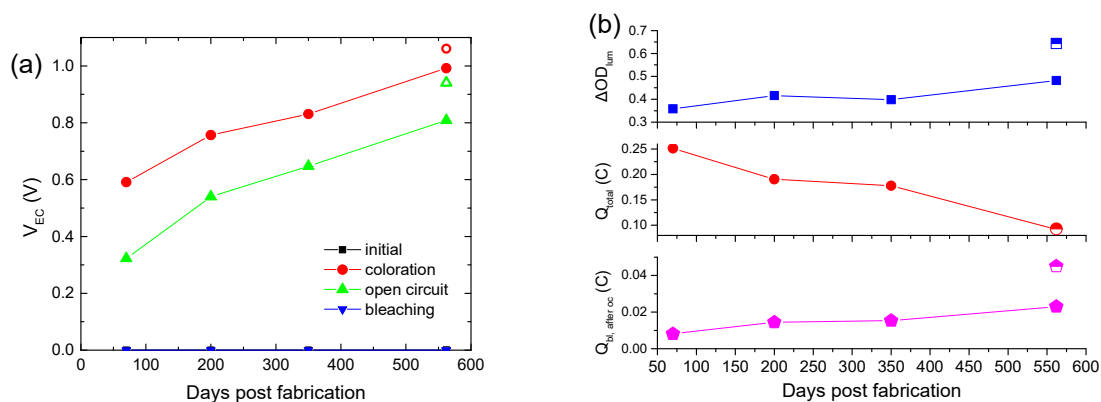

**Figure S7.** (a) Variation in the potential at the terminals of the ECD ( $V_{EC}$ ) at the end of each step during a coloration–bleaching cycle with days post-fabrication, (b) variation in  $\Delta OD_{lum}$ ,  $Q_{total}$  and  $Q_{bl, after oc}$  with days post-fabrication. (open symbols are used in the case of the fresh electrolyte).

## References:

1. A.A.A. Georg, A.A.A. Georg, Electrochromic device with a redox electrolyte, *Sol. Energy Mater. Sol. Cells.* 93 (2009) 1329–1337. doi:10.1016/j.solmat.2009.02.009.
2. R. Giannuzzi, C.T. Prontera, V. Primiceri, A.L. Capodilupo, M. Pugliese, F. Mariano, A. Maggiore, G. Gigli, V. Maiorano, Hybrid electrochromic device with transparent electrolyte, *Sol. Energy Mater. Sol. Cells.* 257 (2023) 112346. doi:10.1016/j.solmat.2023.112346.
3. J. Bae, H. Kim, H.C. Moon, S.H. Kim, Low-voltage, simple WO<sub>3</sub>-based electrochromic devices by directly incorporating an anodic species into the electrolyte, *J. Mater. Chem. C* 4 (2016) 10887–10892. doi:10.1039/C6TC03463B.
4. Z. Wang, K. Shen, H. Xie, B. Xue, J. Zheng, C. Xu, Robust non-complementary electrochromic device based on WO<sub>3</sub> film and CoS catalytic counter electrode with TMTU/TMFDS<sup>2+</sup> redox couple, *Chem. Eng. J.* 426 (2021) 131314. doi:10.1016/j.cej.2021.131314.
5. S. Bogati, A. Georg, W. Graf, Sputtered Si<sub>3</sub>N<sub>4</sub> and SiO<sub>2</sub> electron barrier layer between a redox electrolyte and the WO<sub>3</sub> film in electrochromic devices, *Sol. Energy Mater. Sol. Cells.* 159 (2017) 395–404. doi:10.1016/j.solmat.2016.08.023.
6. M. Hočevár, U. Opara Krašovec, Solid electrolyte containing a colorless redox couple for electrochromic device, *Sol. Energy Mater. Sol. Cells.* 196 (2019) 9–15. doi:10.1016/j.solmat.2019.03.027.
7. S. Bogati, A. Georg, C. Jerg, W. Graf, Tetramethylthiourea (TMTU) as an alternative redox mediator for electrochromic devices, *Sol. Energy Mater. Sol. Cells.* 157 (2016) 454–461. doi:10.1016/j.solmat.2016.07.023.
8. L. Niklaus, M. Schott, U. Posset, G.A. Giffin, Redox Electrolytes for Hybrid Type II Electrochromic Devices with Fe–MEPE or Ni 1–x O as Electrode Materials, *ChemElectroChem.* 7 (2020) 3274–3283. doi:10.1002/celec.202000583.
9. Y.M. Kim, X. Li, K.-W. Kim, S.H. Kim, H.C. Moon, Tetrathiafulvalene: effective organic anodic materials for WO<sub>3</sub>-based electrochromic devices, *RSC Adv.* 9 (2019) 19450–19456. doi:10.1039/C9RA02840D.
10. M. Čolović, M. Hajzeri, M. Tramšek, B. Orel, A.K. Surca, In situ Raman and UV–visible study of hybrid electrochromic devices with bis end-capped designed trialkoxysilyl-functionalized ionic liquid based electrolytes, *Sol. Energy Mater. Sol. Cells.* 220 (2021) 110863. doi:10.1016/j.solmat.2020.110863.
11. Y. Ke, Z. Wang, H. Xie, M.A. Khalifa, J. Zheng, C. Xu, Long-Term Stable Complementary Electrochromic Device Based on WO<sub>3</sub> Working Electrode and NiO–Pt Counter Electrode, *Membranes (Basel)* 13 (2023) 601. doi:10.3390/membranes13060601.
12. S.M. Wang, Y. Wang, T. Wang, Z. Han, C. Cho, E. Kim, Charge-Balancing Redox Mediators for High Color Contrast Electrochromism on Polyoxometalates, *Adv. Mater. Technol.* 5 (2020) 1–9. doi:10.1002/admt.202000326.
